# Supplementary material for: Occurrence of Peptide-Peptide Interactions during the Purification of Self-Assembling Peptide f1-8 from a β-Lactoglobulin Tryptic Hydrolysate
Source: MDPI journal article supplement (doi:10.3390/molecules26051432), 2021-03-06
Supplement: s1 [file s1]

# Supplementary Materials:

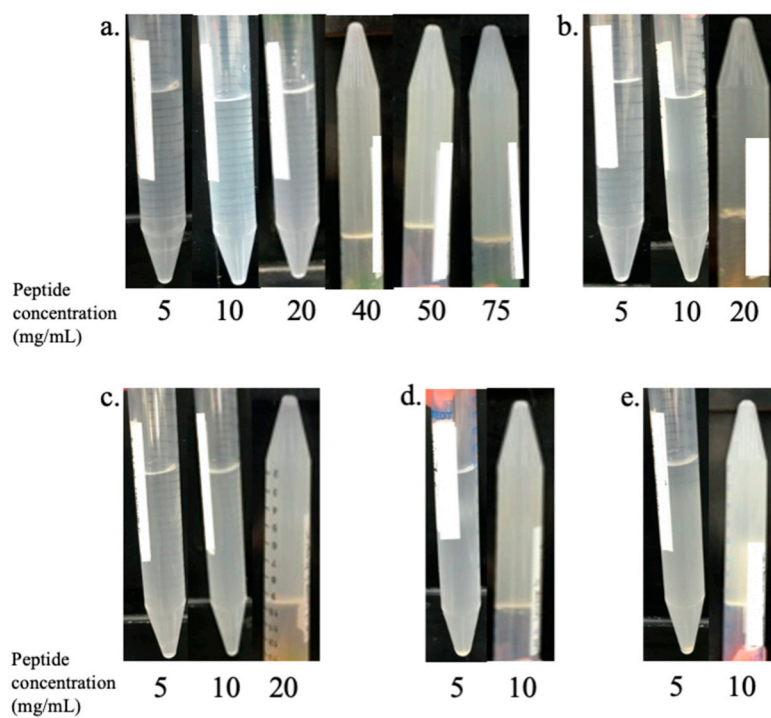

**Supplementary material 1.** Gelling ability of P1 (a), P2 (b), P3 (c), P4 (d) and P5 (e) solubilized at different concentrations and adjusted to pH 11.
